# Supplementary material
Source: PubMed Central journal article supplement (PMC3211047)
Supplement: NIHMS335533-supplement-2.pdf [file NIHMS335533-supplement-2.pdf]

cells), or 22RV1-Luc ( $2 \times 10^5$  cells) or PC3-Luc ( $5 \times 10^5$  cells) were resuspended in 100 $\mu$ l of saline with 20% Matrigel (BD Biosciences) and were implanted subcutaneously into the left flank regions of the mice. Details are available in *Supplementary Material Experimental Procedures*.

### Statistical analysis

All values presented in the study were expressed as mean  $\pm$  SEM. The significant differences between the groups were analyzed by a Student's *t* test and a *P* value of  $<0.05$  or  $<0.001$  were considered significant.

### SUPPLEMENTAL MATERIAL

Supplemental Information includes detailed experimental procedures and eight supplementary figures.

**Figure S1.** rSPINK1 or CM collected from 22RV1 cells induces invasion in benign or cancer cells.

**Figure S2.** CM collected from 22RV1 cells induces cell invasion, but not CM from LNCaP cells.

**Figure S3.** *PRSSI* (trypsin1) knockdown in 22RV1 cells has no effect on SPINK1 mediated cell invasion.

**Figure S4.** Exogenous rSPINK1 has no effect on PSA in 22RV1 cells.

**Figure S5.** SPINK1 mAb reduces SPINK1<sup>+</sup> cell motility and SPINK1 knockdown alters MAPK pathway.

**Figure S6.** Exogenous SPINK1 induces EGFR dimerization and phosphorylation.

**Figure S7.** SPINK1 mAb induces decrease in tumor proliferation index, but has no effect on toxicity markers.

**Figure S8.** Anti-IgG or -SPINK1 mAb or C225 administration has no effect on mouse body weight.

## REFERENCES AND NOTES

1. A. Jemal, R. Siegel, J. Xu, E. Ward, Cancer statistics, 2010. *CA Cancer J Clin* **60**, 277-300 (2010).
2. B.E. Helgeson, S.A. Tomlins, N. Shah, B. Laxman, Q. Cao, J.R. Prensner, X. Cao, N. Singla, J.E. Montie, S. Varambally, R. Mehra, A.M. Chinnaiyan, Characterization of TMPRSS2:ETV5 and SLC45A3:ETV5 gene fusions in prostate cancer. *Cancer Res* **68**, 73-80 (2008).
3. S.A. Tomlins, D.R. Rhodes, S. Perner, S.M. Dhanasekaran, R. Mehra, X.W. Sun, S. Varambally, X. Cao, J. Tchinda, R. Kuefer, C. Lee, J.E. Montie, R.B. Shah, K.J. Pienta, M.A. Rubin, A.M. Chinnaiyan, Recurrent fusion of TMPRSS2 and ETS transcription factor genes in prostate cancer. *Science* **310**, 644-648 (2005).
4. S.A. Tomlins, R. Mehra, D.R. Rhodes, L.R. Smith, D. Roulston, B.E. Helgeson, X. Cao, J.T. Wei, M.A. Rubin, R.B. Shah, A.M. Chinnaiyan, TMPRSS2:ETV4 gene fusions define a third molecular subtype of prostate cancer. *Cancer Res* **66**, 3396-3400 (2006).
5. S.A. Tomlins, B. Laxman, S.M. Dhanasekaran, B.E. Helgeson, X. Cao, D.S. Morris, A. Menon, X. Jing, Q. Cao, B. Han, J. Yu, L. Wang, J.E. Montie, M.A. Rubin, K.J. Pienta, D. Roulston, R.B. Shah, S. Varambally, R. Mehra, A.M. Chinnaiyan, Distinct classes of chromosomal rearrangements create oncogenic ETS gene fusions in prostate cancer. *Nature* **448**, 595-599 (2007).
6. S.A. Tomlins, A. Bjartell, A.M. Chinnaiyan, G. Jenster, R.K. Nam, M.A. Rubin, J.A. Schalken, ETS Gene Fusions in Prostate Cancer: From Discovery to Daily Clinical Practice. *Eur Urol* **56**, 275-286 (2009).
7. Y. Zong, L. Xin, A.S. Goldstein, D.A. Lawson, M.A. Teitell, O.N. Witte, ETS family transcription factors collaborate with alternative signaling pathways to induce carcinoma from adult murine prostate cells. *Proc Natl Acad Sci U S A* (2009).
8. J.C. King, J. Xu, J. Wongvipat, H. Hieronymus, B.S. Carver, D.H. Leung, B.S. Taylor, C. Sander, R.D. Cardiff, S.S. Couto, W.L. Gerald, C.L. Sawyers, Cooperativity of TMPRSS2-ERG with PI3-kinase pathway activation in prostate oncogenesis. *Nat Genet* **41**, 524-526 (2009).
9. B.S. Carver, J. Tran, A. Gopalan, Z. Chen, S. Shaikh, A. Carracedo, A. Alimonti, C. Nardella, S. Varmeh, P.T. Scardino, C. Cordon-Cardo, W. Gerald, P.P. Pandolfi, Aberrant ERG expression cooperates with loss of PTEN to promote cancer progression in the prostate. *Nat Genet* **41**, 619-624 (2009).
10. S.A. Tomlins, D.R. Rhodes, J. Yu, S. Varambally, R. Mehra, S. Perner, F. Demichelis, B.E. Helgeson, B. Laxman, D.S. Morris, Q. Cao, X. Cao, O. Andren, K. Fall, L. Johnson, J.T. Wei, R.B. Shah, H. Al-Ahmadie, J.A. Eastham, S.E. Eggener, S.W. Fine, K. Hotakainen, U.H. Stenman, A. Tsodikov, W.L. Gerald, H. Lilja, V.E. Reuter, P.W. Kantoff, P.T. Scardino, M.A. Rubin, A.S. Bjartell, A.M. Chinnaiyan, The role of SPINK1 in ETS rearrangement-negative prostate cancers. *Cancer Cell* **13**, 519-528 (2008).
11. L.A. Kazal, D.S. Spicer, R.A. Brahinsky, Isolation of a crystalline trypsin inhibitor-anticoagulant protein from pancreas. *J Am Chem Soc* **70**, 3034-3040 (1948).
